# Supplementary material for: Semi-Interpenetrating Polymer Networks with Predefined Architecture for Metal Ion Fluorescence Monitoring
Source: PubMed Central journal article supplement (PMC6431864; doi:10.3390/polym8120411), 2016-11-29
Supplement: polymers-08-00411-s001.pdf [file polymers-08-00411-s001.pdf]

# Supplementary Materials: Semi-Interpenetrating Polymer Networks with Pre-Defined Architecture for Metal Ion Fluorescence Monitoring

Kyriakos Christodoulou, Epameinondas Leontidis, Mariliz Achilleos, Christiana Polydorou and Theodora Krasia-Christoforou

**Table S1.** Concentration of the metal ion quenchers ( $\text{Cu}^{2+}$ ,  $\text{Fe}^{3+}$ ) and  $I_0/I$  data obtained by fluorescence spectroscopy when using 9-anthracenemethanol as a fluorophore.

| $\text{Cu}^{2+}$   |                                     | $\text{Fe}^{3+}$   |                                     |
|--------------------|-------------------------------------|--------------------|-------------------------------------|
| Concentration (mM) | $I_0/I$ (at $\lambda = \text{nm}$ ) | Concentration (mM) | $I_0/I$ (at $\lambda = \text{nm}$ ) |
| 0                  | 1.000                               | 0                  | 1.0000                              |
| 0.1                | 1.093                               | 0.1                | 1.7300                              |
| 0.5                | 1.197                               | 0.175              | 3.7900                              |
| 1.0                | 1.359                               | 0.25               | 4.9300                              |

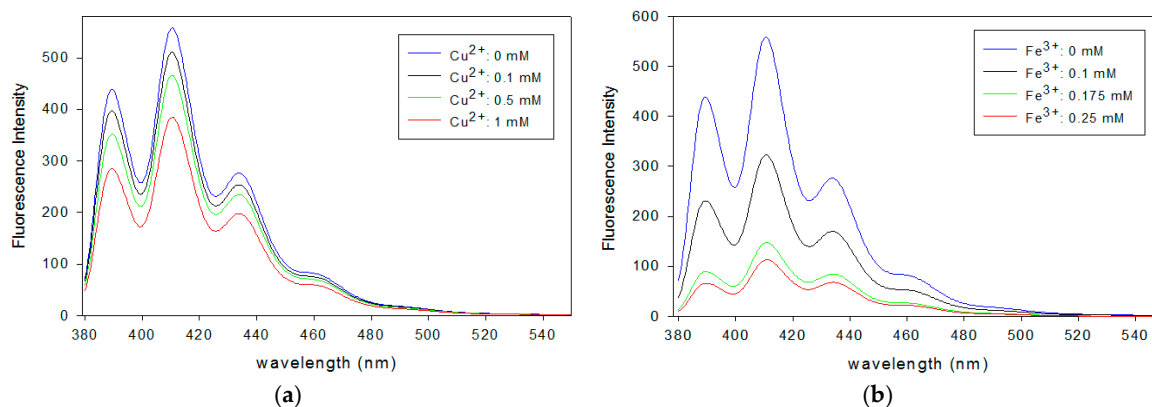

**Figure S1.** Fluorescence spectra of the 9-anthracenemethanol after being exposed to methanol solutions of various metal ion concentrations:  $\text{Cu}^{2+}$  fluorescence monitoring (a);  $\text{Fe}^{3+}$  monitoring (b).
